# Supplementary material for: Gray Matter Microstructural Abnormalities and Working Memory Deficits in Individuals with Schizophrenia
Source: PubMed Central journal article supplement — Psychiatry Investig. 2019 Mar 21;16(3):234–43. doi: 10.30773/pi.2018.10.14.1 (PMC6444097; doi:10.30773/pi.2018.10.14.1), 2019-03-21
Supplement: pi-2018-10-14-1-suppl.pdf [file pi-2018-10-14-1-suppl.pdf]

**Supplementary Table 1.** All parcellated regions of interest in the gray matter

| Regions of interest |                                           |                  |                                            |
|---------------------|-------------------------------------------|------------------|--------------------------------------------|
| Left hemisphere     |                                           | Right hemisphere |                                            |
| 1                   | Left bank of the superior temporal sulcus | 35               | Right bank of the superior temporal sulcus |
| 2                   | Left caudal anterior cingulate cortex     | 36               | Right caudal anterior cingulate cortex     |
| 3                   | Left caudal middle frontal gyrus          | 37               | Right caudal middle frontal gyrus          |
| 4                   | Left cuneus                               | 38               | Right cuneus                               |
| 5                   | Left entorhinal cortex                    | 39               | Right entorhinal cortex                    |
| 6                   | Left frontal pole                         | 40               | Right frontal pole                         |
| 7                   | Left fusiform gyrus                       | 41               | Right fusiform gyrus                       |
| 8                   | Left inferior parietal cortex             | 42               | Right inferior parietal cortex             |
| 9                   | Left inferior temporal gyrus              | 43               | Right inferior temporal gyrus              |
| 10                  | Left insula cortex                        | 44               | Right insula cortex                        |
| 11                  | Left isthmus of the cingulate gyrus       | 45               | Right isthmus of the cingulate gyrus       |
| 12                  | Left lateral occipital cortex             | 46               | Right lateral occipital cortex             |
| 13                  | Left lateral orbitofrontal cortex         | 47               | Right lateral orbitofrontal cortex         |
| 14                  | Left lingual gyrus                        | 48               | Right lingual gyrus                        |
| 15                  | Left medial orbitofrontal cortex          | 49               | Right medial orbitofrontal cortex          |
| 16                  | Left middle temporal gyrus                | 50               | Right middle temporal gyrus                |
| 17                  | Left paracentral lobule                   | 51               | Right paracentral lobule                   |
| 18                  | Left parahippocampal gyrus                | 52               | Right parahippocampal gyrus                |
| 19                  | Left pars opercularis                     | 53               | Right pars opercularis                     |
| 20                  | Left pars orbitalis                       | 54               | Right pars orbitalis                       |
| 21                  | Left pars triangularis                    | 55               | Right pars triangularis                    |
| 22                  | Left pericalcarine                        | 56               | Right pericalcarine                        |
| 23                  | Left postcentral cortex                   | 57               | Right postcentral cortex                   |
| 24                  | Left posterior cingulate cortex           | 58               | Right posterior cingulate cortex           |
| 25                  | Left precentral cortex                    | 59               | Right precentral cortex                    |
| 26                  | Left precuneus                            | 60               | Right precuneus                            |
| 27                  | Left rostral anterior cingulate cortex    | 61               | Right rostral anterior cingulate cortex    |
| 28                  | Left rostral middle frontal gyrus         | 62               | Right rostral middle frontal gyrus         |
| 29                  | Left superior frontal gyrus               | 63               | Right superior frontal gyrus               |
| 30                  | Left superior parietal cortex             | 64               | Right superior parietal cortex             |
| 31                  | Left superior temporal gyrus              | 65               | Right superior temporal gyrus              |
| 32                  | Left supramarginal gyrus                  | 66               | Right supramarginal gyrus                  |
| 33                  | Left temporal pole                        | 67               | Right temporal pole                        |
| 34                  | Left transverse temporal gyrus            | 68               | Right transverse temporal gyrus            |
